# Supplementary material
Source: PubMed Central journal article supplement (PMC2722332)
Supplement: 0905563106_0905563106SI.pdf [file 0905563106_0905563106SI.pdf]

# Supporting Information

Yang and Bennetzen 10.1073/pnas.0905563106

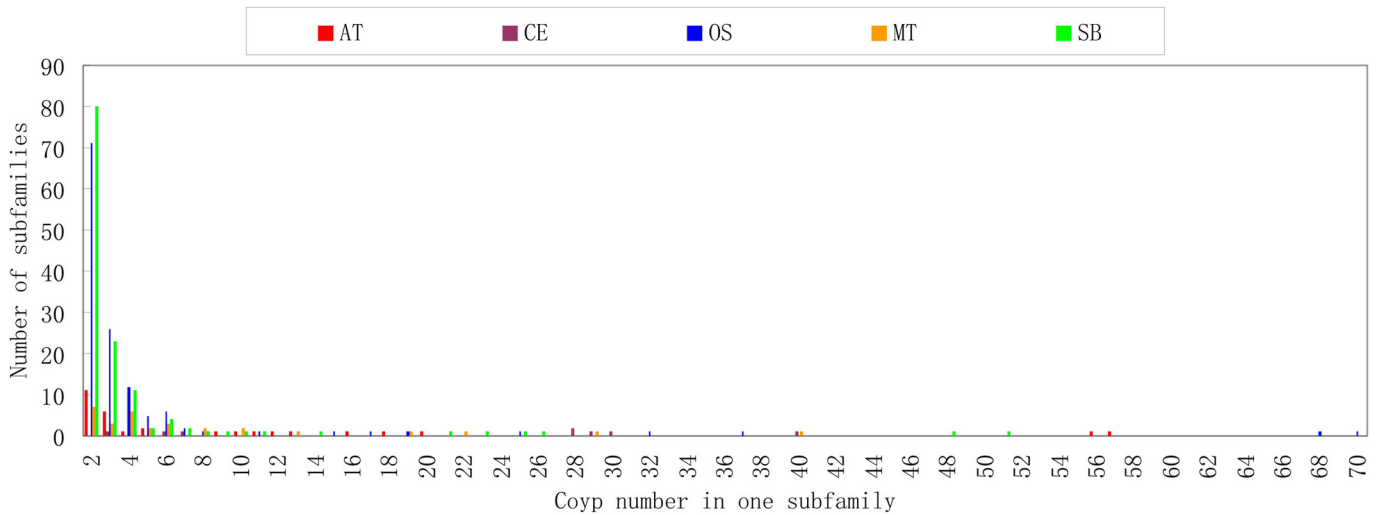

(A)

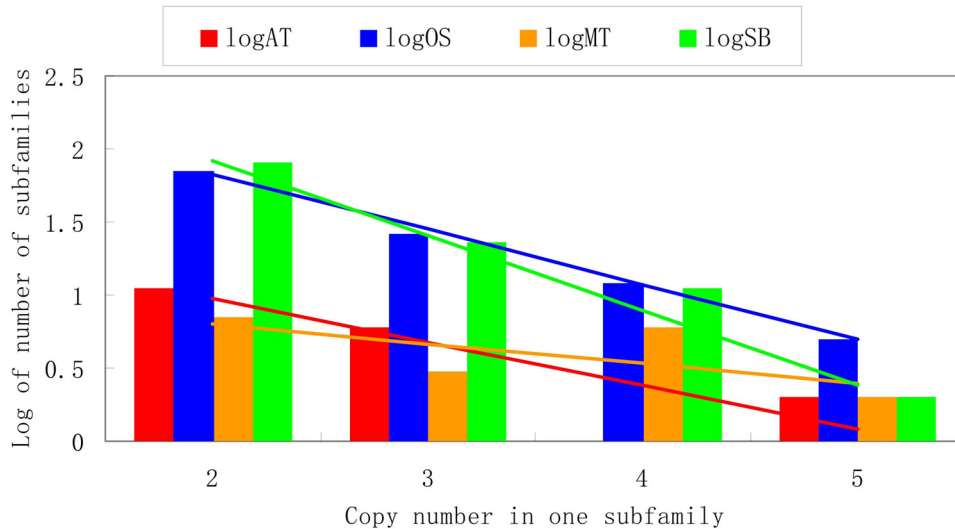

(B)

**Fig. S1.** Distribution of *Helitron* copy numbers in different subfamilies. (A) *x* axis, *Helitron* copy number in each subfamily; *y* axis, number of subfamilies with this element copy number. *Helitron* copy number results are shown for *A. thaliana*, *C. elegans*, *O. sativa*, *M. truncatula*, and *S. bicolor*. (B) *x* axis, *Helitron* copy numbers in each subfamily (2–5 copies shown); *y* axis, log transformed number (base 10) of the number of subfamilies with this copy number. Linear regression lines are also shown and used to estimate the number of single copy elements.

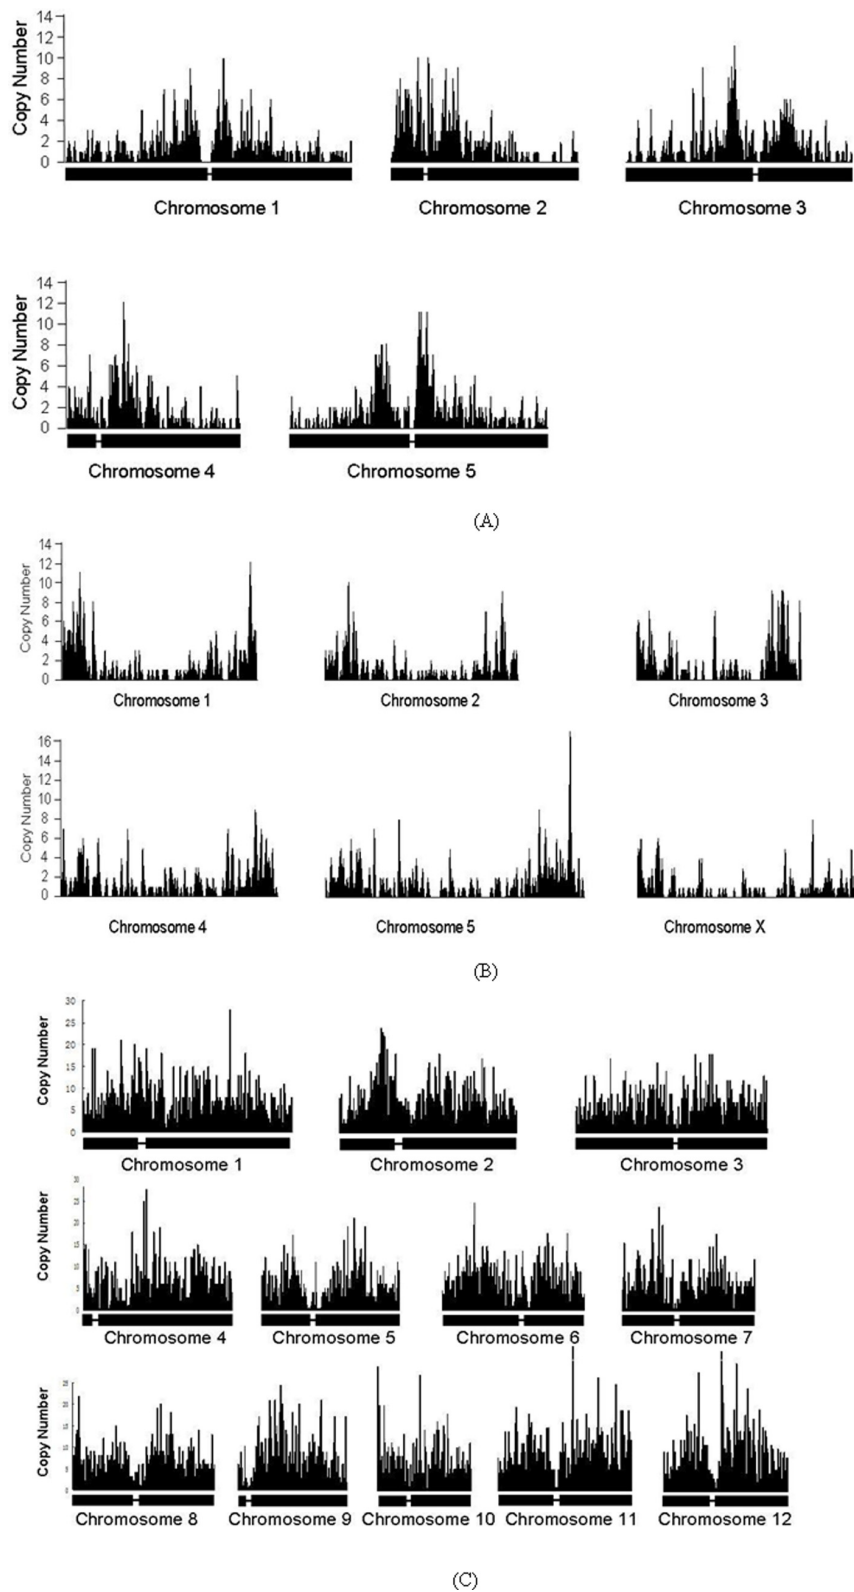

**Fig. S2.** Distribution of *Helitrons* along the chromosomes of *A. thaliana* (A), *C. elegans* (B), and *O. sativa* (C). The x axis shows the chromosome locations and the y axis indicates the copy numbers of *Helitrons* (both intact and truncated elements) per 100 kb. Narrow lines in A and C on the x axis indicate the positions of centromeres.

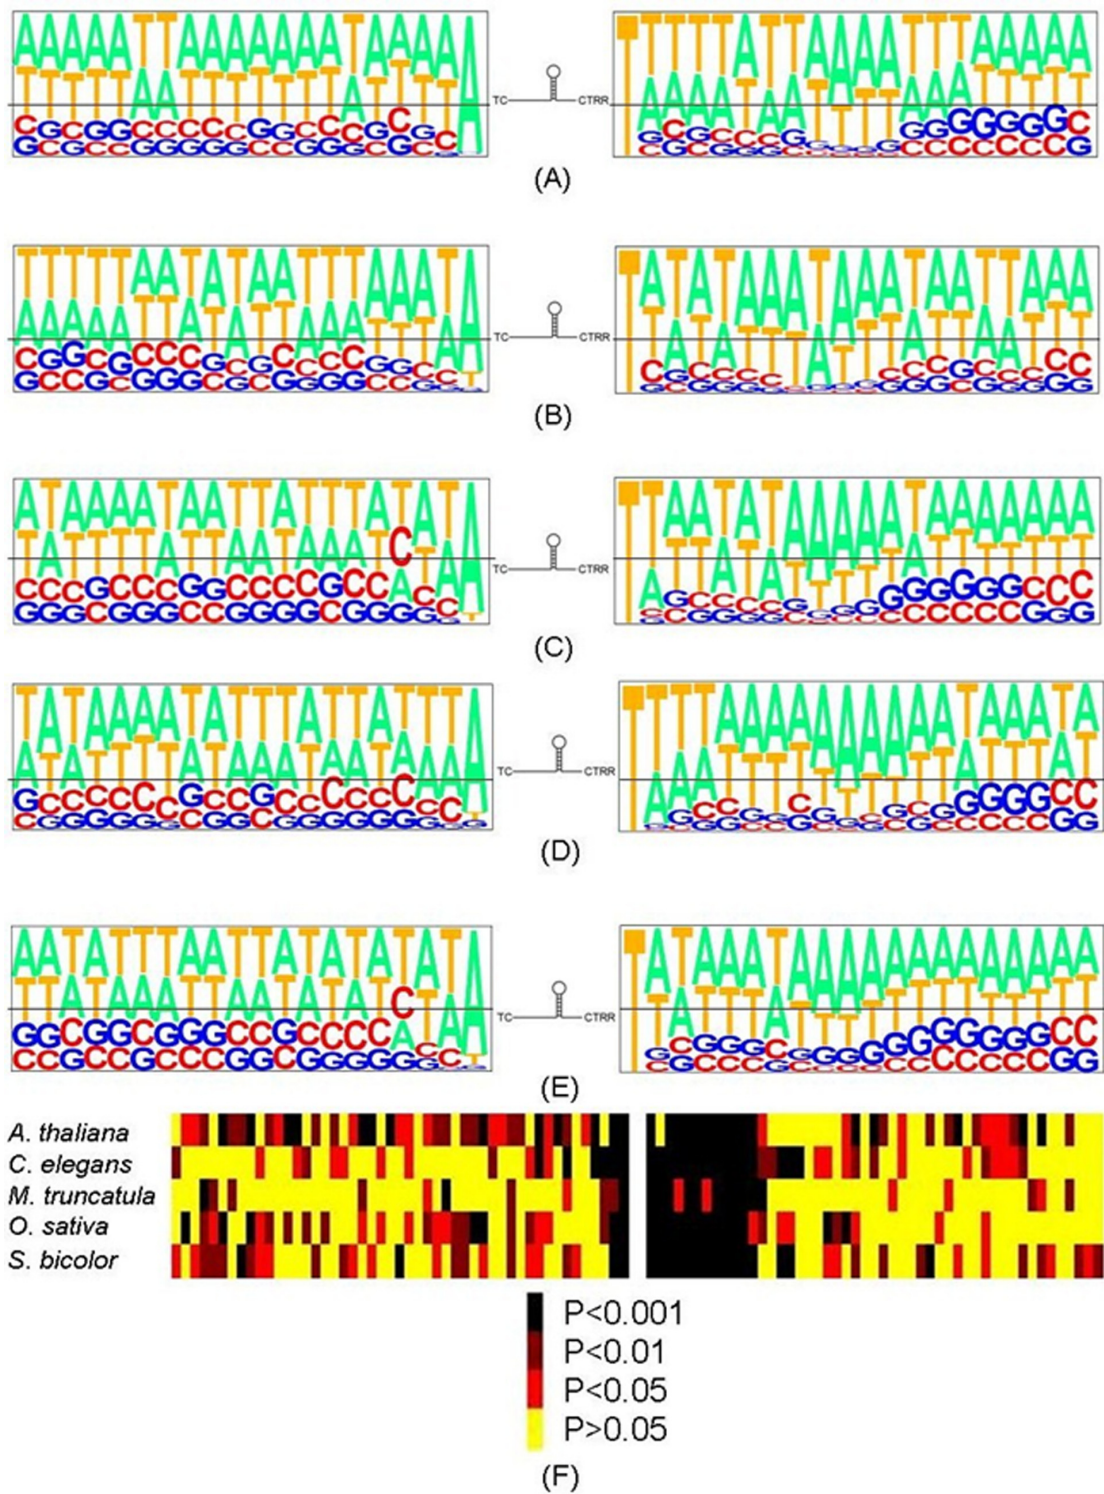

**Fig. S3.** Insertion site base composition. *Left side of Helitrons*, 20 bp upstream of *Helitron* insertion sites. *Right side of Helitrons*, 20 bp downstream of *Helitron* insertion sites. Black lines in A–E indicate average GC content of the genome. (A) *Helitrons* of *A. thaliana*. (B) *Helitrons* of *C. elegans*. (C) *Helitrons* of *O. sativa*. (D) *Helitrons* of *M. truncatula*. (E) *Helitrons* of *S. bicolor*. (F)  $\chi^2$  tests of GC content for 50 bp upstream and downstream of *Helitron* insertion sites on each position compared to a random AT flanking site from the same genome. The *P* value is indicated by color, with black representing the most significant and yellow the least significant associations.

**Table S1. Helitron families in *A. thaliana***

| Family name | No. of intact element | Size range, bp | Original name(s) of known <i>Helitron</i> (s)                 | Putative autonomous elements | Gene fragment(s) |
|-------------|-----------------------|----------------|---------------------------------------------------------------|------------------------------|------------------|
| <i>Hug</i>  | 195                   | 360–2,734      | ATREP1, ATREP2, ATREP3, ATREP5, ATREP11, AtREP21, HELITRONY1A |                              | +                |
| <i>Hali</i> | 27                    | 775–1,709      | ATREP6, ATREP9                                                |                              |                  |
| <i>Hari</i> | 22                    | 642–1,500      | ATREP10                                                       |                              |                  |
| <i>Hane</i> | 15                    | 1,346–2,111    | AtREP20                                                       | +                            |                  |
| <i>Hani</i> | 11                    | 606–655        | ATREP13                                                       |                              |                  |
| <i>Hup</i>  | 3                     | 2,106–2,544    | ATREP4                                                        |                              |                  |
| <i>Hame</i> | 3                     | 1,340–1,628    | ATREP12                                                       |                              |                  |
| <i>Hip</i>  | 2                     | 1,189–1,219    |                                                               |                              |                  |
| <i>Hake</i> | 2                     | 3,389–3,395    |                                                               |                              | +                |
| <i>Haki</i> | 1                     | 817–903        | ATREP7                                                        |                              |                  |
| Total       | 281                   | 360–3,395      |                                                               |                              |                  |

**Table S2. Helitron families in *C. elegans***

| Family name | No. of intact element | Size range, bp | Original name(s) of known Helitron(s)                     | Putative autonomous elements | Gene fragment(s) |
|-------------|-----------------------|----------------|-----------------------------------------------------------|------------------------------|------------------|
| <i>Hike</i> | 206                   | 182–4,802      | HELITRON2_CE, HELITRONY2_CE, HELITRONY3_CE, HELITRONY4_CE | +                            |                  |
| <i>Hibe</i> | 38                    | 866–8,965      | HELITRON1_CE, HELITRONY1_CE                               | +                            |                  |
| <i>Hino</i> | 30                    | 1,313–1,605    | NDNAX3_CE                                                 |                              |                  |
| <i>Hite</i> | 7                     | 1,709–2,164    | NDNAX1_CE                                                 |                              |                  |
| Total       | 281                   | 182–8,965      |                                                           |                              |                  |

Table S3. *Helitron* families in *M. truncatula*

| Family name  | No. of intact element | Size range, bp | Original name(s) of known <i>Helitron</i> (s) | Putative autonomous elements | Gene fragment(s) |
|--------------|-----------------------|----------------|-----------------------------------------------|------------------------------|------------------|
| <i>Hip</i>   | 99                    | 1,281–5,357    | HELITRON1N.MT                                 | +                            | +                |
| <i>Hem</i>   | 53                    | 375–3,249      |                                               |                              |                  |
| <i>Heno</i>  | 33                    | 2,445–5,717    | HELMET                                        | +                            | +                |
| <i>Heto</i>  | 33                    | 3,055–5,643    |                                               |                              | +                |
| <i>Hefo</i>  | 3                     | 8,279–8,394    | HELMET2                                       | +                            |                  |
| <i>Heke</i>  | 2                     | 450–472        |                                               |                              |                  |
| <i>Hebo</i>  | 2                     | 817            |                                               |                              |                  |
| <i>Hecu</i>  | 2                     | 1,910–1,913    |                                               |                              |                  |
| <i>Heku</i>  | 2                     | 3,043          |                                               |                              |                  |
| <i>Hecho</i> | 1                     | 14,261         | HELITRON1MT                                   | +                            |                  |
| Total        | 230                   | 375–14,261     |                                               |                              |                  |

**Table S4. Helitron families in *O. sativa* ssp. *japonica* cultivar Nipponbare**

| Family name  | No. of intact element | Size range, bp    | Original name(s) of known Helitron(s)    | Putative autonomous elements | Gene fragment(s) |
|--------------|-----------------------|-------------------|------------------------------------------|------------------------------|------------------|
| <i>Hup</i>   | 280                   | 230–15,654        |                                          | +                            | +                |
| <i>Hip</i>   | 196                   | 242–4,984         |                                          |                              | +                |
| <i>Hair</i>  | 116                   | 180–2,577         |                                          |                              | +                |
| <i>Hole</i>  | 18                    | 2,357–4,705       |                                          |                              |                  |
| <i>Hoy</i>   | 10                    | 350–10,152        | HELITRON7_OS                             | +                            |                  |
| <i>Hocku</i> | 6                     | 1,058–6,263       |                                          |                              | +                |
| <i>Hova</i>  | 5                     | 3,776–13,092      | HELITRON2_OS, HELITRON3_OS               | +                            |                  |
| <i>Holie</i> | 4                     | 705–1,911         |                                          |                              |                  |
| <i>Horia</i> | 4                     | 2,635–3,198       |                                          |                              |                  |
| <i>Howi</i>  | 3                     | 1,896–1,955       |                                          |                              |                  |
| <i>Hota</i>  | 2                     | 2,085–2,133       |                                          |                              | +                |
| <i>Hoku</i>  | 2                     | 1,429–1,695       |                                          |                              |                  |
| <i>Honu</i>  | 2                     | 210–219           |                                          |                              |                  |
| <i>Hok</i>   | 2                     | 187–189           |                                          |                              |                  |
| <i>Hani</i>  | 2                     | 1,140–1,143       |                                          |                              |                  |
| <i>Hoju</i>  | 2                     | 2,180–2,233       |                                          |                              |                  |
| <i>Holda</i> | 2                     | 15,063–15,147     | HELITRON1_OS, HELITRON5_OS, HELITRON8_OS | +                            |                  |
| <i>Holku</i> | 2                     | 1,891–1,977       |                                          |                              |                  |
| <i>Homno</i> | 2                     | 3,532–3,790       |                                          |                              | +                |
| <i>Holta</i> | 2                     | 1,172–1,422       |                                          |                              |                  |
| <i>Holvo</i> | 2                     | 6,117–6,186       |                                          |                              | +                |
| <i>Howa</i>  | 2                     | 1,503–1,506       |                                          |                              |                  |
| <i>Hofa</i>  | 2                     | 911–912           |                                          |                              |                  |
| <b>Total</b> | <b>668</b>            | <b>180–15,147</b> |                                          |                              |                  |

Table S5. *Helitron* families in *S. bicolor*

| Family name  | No. of intact element | Size range, bp | Original name(s) of known <i>Helitron</i> (s) | Putative autonomous elements | Gene fragment(s) |
|--------------|-----------------------|----------------|-----------------------------------------------|------------------------------|------------------|
| <i>Hip</i>   | 289                   | 289–21,899     |                                               | +                            | +                |
| <i>Hair</i>  | 153                   | 238–532        |                                               |                              |                  |
| <i>Hole</i>  | 119                   | 1,248–4,499    |                                               |                              | +                |
| <i>Hok</i>   | 22                    | 356–3,005      |                                               |                              |                  |
| <i>Hoy</i>   | 9                     | 986–11,062     |                                               |                              |                  |
| <i>Huyo</i>  | 6                     | 268–384        |                                               |                              |                  |
| <i>Hubi</i>  | 2                     | 148–149        |                                               |                              |                  |
| <i>Husi</i>  | 2                     | 3,423–3,426    |                                               |                              |                  |
| <i>Huca</i>  | 2                     | 172–174        |                                               |                              |                  |
| <i>Huphi</i> | 2                     | 1,718–1,903    |                                               |                              |                  |
| <i>Huga</i>  | 2                     | 2,435–2,568    |                                               |                              |                  |
| Total        | 608                   | 148–21,899     |                                               |                              |                  |



Table S6. Gene fragments acquired by *Helitrons*

| Name               | Size  | Gene fragments                                    | Expect value | Identity, % |
|--------------------|-------|---------------------------------------------------|--------------|-------------|
| <i>Hug_AT2_1</i>   | 2,182 | Putative protein                                  | e-35         | 94          |
|                    |       | Protein in rice                                   | e-14         | 46          |
| <i>Hake_AT1_1</i>  | 3,389 | Transferase                                       | e-24         | 93          |
| <i>Hug_AT4_75</i>  | 747   | Hypothetical protein (yeast)                      | e-14         | 51          |
| <i>Hup_OS3_1</i>   | 3,410 | RNA polymerase beta chain                         | e-42         | 84          |
| <i>Hota_OS1_1</i>  | 2,083 | Unknown                                           | e-40         | 94          |
| <i>Hocku_OS1_1</i> | 6,261 | FAD-binding domain-containing protein-like        | e-79         | 81          |
|                    |       | Unknown                                           | e-16         | 90          |
| <i>Hup_OS1_3</i>   | 2,467 | Calmodulin                                        | e-17         | 80          |
| <i>Hup_OS1_56</i>  | 2,830 | RNA polymerase beta subunit                       | e-9          | 51          |
| <i>Hup_OS1_65</i>  | 2,359 | Calmodulin                                        | e-8          | 43          |
| <i>Hup_OS1_157</i> | 2,687 | ARM repeat fold domain                            | e-41         | 80          |
| <i>Hair_OS8_1</i>  | 2,372 | Unknown                                           | e-10         | 57          |
| <i>Hair_OS9_1</i>  | 1,927 | Unknown                                           | e-30         | 89          |
|                    |       | Unknown                                           | e-30         | 87          |
| <i>Hair_OS10_1</i> | 373   | Unknown                                           | e-10         | 73          |
| <i>Hip_OS5_1</i>   | 4,313 | Unknown                                           | e-11         | 43          |
| <i>Hip_OS1_1</i>   | 1,404 | Root cap protein 1-like                           | e-31         | 82          |
| <i>Hip_OS7_1</i>   | 4,908 | Unknown                                           | e-22         | 78          |
|                    |       | Unknown                                           | e-11         | 53          |
| <i>Hip_OS7_4</i>   | 4,140 | Unknown                                           | e-36         | 92          |
|                    |       | Unknown                                           | e-18         | 97          |
| <i>Homno_OS1_1</i> | 3,530 | Unknown                                           | e-71         | 96          |
| <i>Holvo_OS1_1</i> | 6,184 | Putative RING zinc finger protein                 | e-35         | 65          |
| <i>Hip_MT1_1</i>   | 5,016 | Nucleic acid-binding, OB-fold                     | e-14         | 85          |
| <i>Hip_MT1_13</i>  | 4,364 | Nucleic acid-binding, OB-fold                     | e-18         | 91          |
| <i>Hip_MT1_43</i>  | 3,913 | Nucleic acid-binding, OB-fold                     | e-10         | 50          |
| <i>Hip_MT2_19</i>  | 3,768 | Polynucleotidyl transferase, Ribonuclease H fold  | e-23         | 58          |
| <i>Heno_MT1_1</i>  | 4,140 | Nucleic acid-binding, OB-fold                     | e-111        | 93          |
| <i>Heto_MT1_1</i>  | 3,202 | Nucleic acid-binding, OB-fold                     | e-51         | 68          |
| <i>Heto_MT1_5</i>  | 3,187 | Nucleic acid-binding, OB-fold                     | e-52         | 69          |
| <i>Heto_MT1_15</i> | 5,428 | Nucleic acid-binding, OB-fold                     | e-29         | 59          |
| <i>Hip_MT3_1</i>   | 4,228 | Nucleic acid-binding, OB-fold                     | e-10         | 86          |
| <i>Hole_SB1_19</i> | 2,261 | Putative glucosyl transferase                     | e-147        | 87          |
| <i>Hole_SB1_23</i> | 1,610 | Glycerol-3-phosphate dehydrogenase                | e-17         | 82          |
| <i>Hole_SB1_28</i> | 3,451 | Putative proteasome 26S non-ATPase subunit 2      | e-10         | 40          |
| <i>Hole_SB1_40</i> | 2,610 | AP-3 complex delta subunit-like protein           | 0            | 68          |
| <i>Hole_SB1_46</i> | 4,125 | Tetratricopeptide repeat (TPR)-containing protein | e-19         | 50          |
| <i>Hole_SB1_53</i> | 2,795 | PUTATIVE ubiquitin carboxyl terminal hydrolase    | e-13         | 81          |
| <i>Hole_SB1_55</i> | 2,936 | Putative RNA-binding protein                      | e-39         | 93          |
| <i>Hole_SB1_57</i> | 3,159 | Hypothetical protein in rice                      | e-15         | 58          |
| <i>Hole_SB1_59</i> | 2,699 | DNA directed RNA polymerase                       | e-13         | 72          |
| <i>Hole_SB1_68</i> | 4,499 | UMP synthase                                      | e-97         | 96          |
| <i>Hip_SB5_1</i>   | 4,072 | Protein phosphatase 2C-related                    | e-122        | 68          |
| <i>Hip_SB2_43</i>  | 1,763 | <i>F-box domain containing protein</i>            | e-21         | 68          |
| <i>Hip_SB2_44</i>  | 1,721 | Hypothetical protein in rice                      | e-56         | 77          |
| <i>Hip_SB2_54</i>  | 1,675 | Unknown in maize                                  | e-29         | 76          |
| <i>Hip_SB2_56</i>  | 2,493 | Unknown in maize                                  | e-19         | 90          |
| <i>Hip_SB3_1</i>   | 4,400 | Unknown in maize                                  | e-19         | 83          |
| <i>Hip_SB3_4</i>   | 5,982 | Unknown in maize                                  | e-12         | 52          |
| <i>Hip_SB3_9</i>   | 2,408 | Cycloartenol synthase                             | e-79         | 86          |
